# Supplementary material
Source: PubMed Central journal article supplement (PMC2662763)
Supplement: NIHMS83343-supplement-1.pdf [file NIHMS83343-supplement-1.pdf]

**Supplementary data**

**GRIM-19 inhibits v-Src-induced cell motility by interfering with  
cytoskeletal restructuring**

**Peng Sun\*<sup>\$</sup>, Shreeram C. Nallar\*, Sudhakar Kalakonda, Daniel J.**

**Lindner<sup>¶</sup>, Stuart S. Martin<sup>&</sup> and Dhananjaya V. Kalvakolanu<sup>\$\$&</sup>**

\*Department of Microbiology & Immunology, <sup>&</sup>Greenebaum Cancer Center, University of  
Maryland School of Medicine, Baltimore, MD 21021. <sup>\$</sup>Molecular and Cellular Cancer

Biology graduate track, The Graduate Program in Life Sciences, University of Maryland  
Baltimore. <sup>¶</sup>Taussig Cancer Center and Department of Cancer Biology, The Cleveland Clinic

Lerner Research Institute, Cleveland, OH 44195

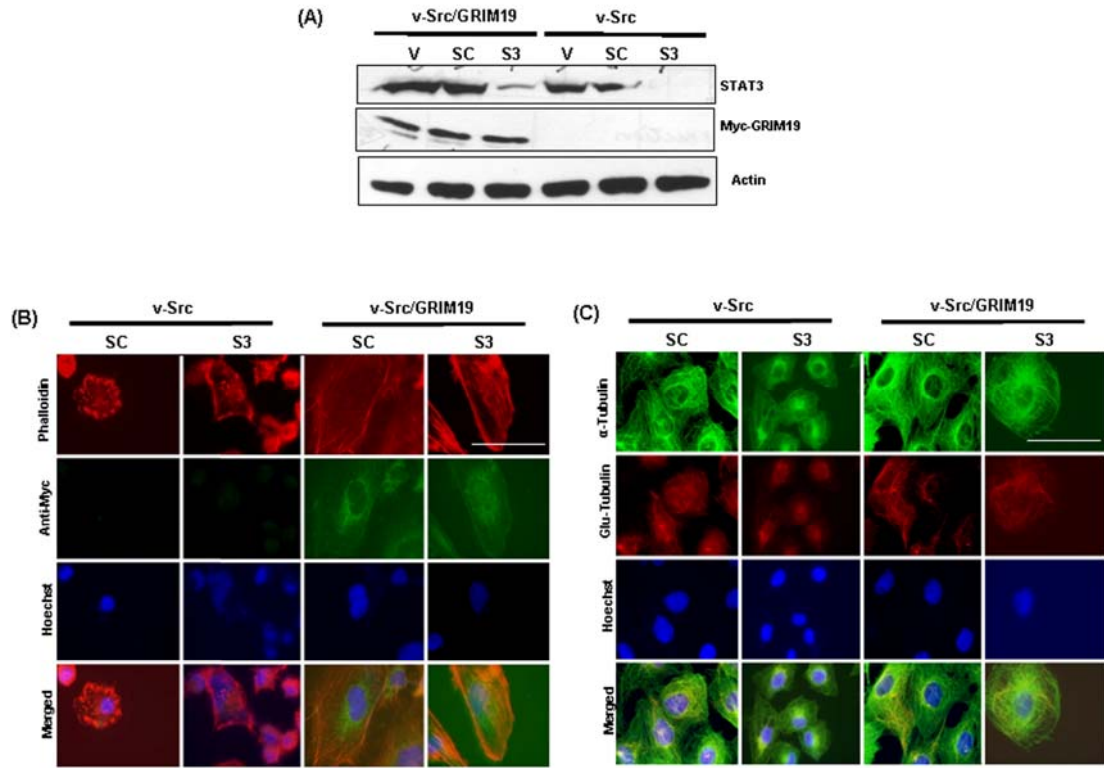

**Fig. S1: Effect of STAT3-specific shRNA on v-Src induced cytoskeletal reorganization and inhibitory role of GRIM-19 on v-Src.** (A) Western blot analysis of the STAT3 shRNA-mediated knockdown of STAT3. (B) Effect of GRIM-19 on v-Src-induced podosome formation and exogenous GRIM-19. Magnification: 100X (C) Detection of tubulin and detyrosinated tubulin with immunofluorescent staining. Magnification: 100X V: *pLK0.1* vector; SC: *scramble shRNA*; S3: *STAT3 shRNA*. Scale bar, 50 $\mu$ m.

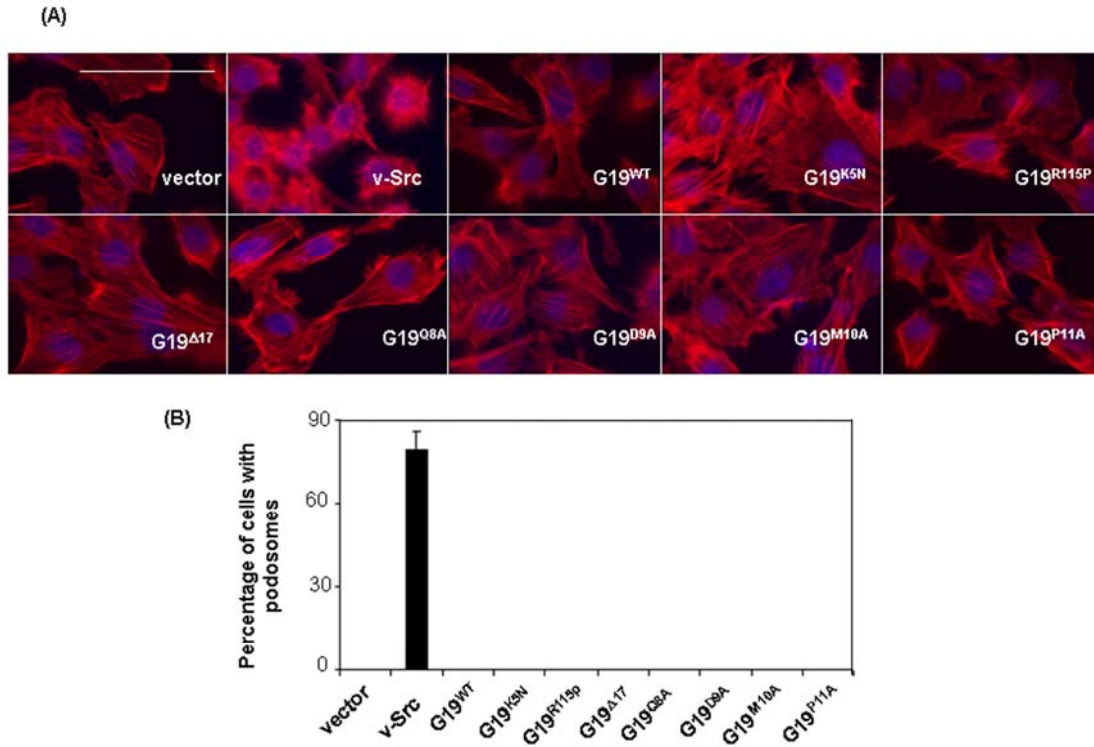

**Fig. S2: Expression of GRIM-19 mutants alone did not induce podosome formation in 3Y1 cells.** (A) Immunofluorescent staining of v-Src transformed 3Y1 cells and 3Y1 cells expressing empty-vector, wildtype GRIM-19 and GRIM-19 mutants with phalloidin for actin and Hoechst for DNA. Magnification: 100X. Scale bar, 50μm. (B) v-Src transformed 3Y1 cells and 3Y1 cells expressing empty vector, wildtype GRIM-19 and GRIM-19 mutants were counted according to the percentage of cells containing podosome.

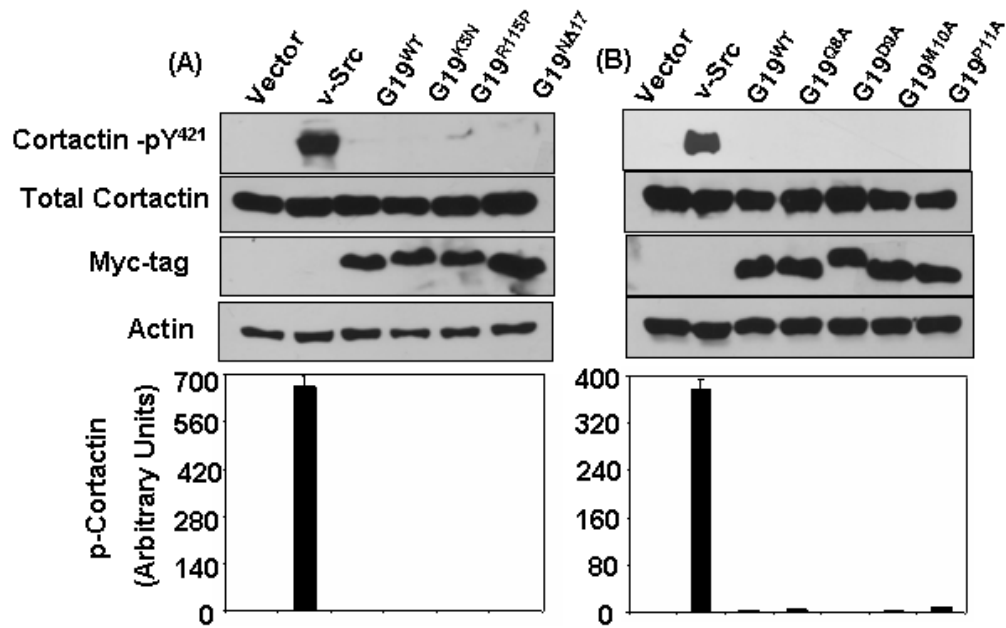

**Fig. S3: Expression of GRIM-19 mutants alone did not cause cortactin phosphorylation in 3Y1 cells. (A&B)** Western blot analysis of v-Src transformed 3Y1 cells 3Y1 cells expressing empty vector wildtype GRIM-19 and GRIM-19 mutants. The graph below each Western blot showed the comparison of the relative optical density (Arbitrary unit) of cortactin phosphorylation status. The optical density of cortactin phosphorylation was normalized against the expression levels of endogenous cortactin and exogenous wildtype GRIM-19 and GRIM-19 mutants. Mean band intensity  $\pm$ SE of 4 independent samples is shown in each case.

**Table S1: Primer sequences used for generating GRIM-19 constructs**

| <b>ID</b> | <b>Sequence (5'-3')</b>                                        |
|-----------|----------------------------------------------------------------|
| WT        | GCG <b>GAATTC</b> GCCACCATGGCGGCGTCAAAGGTG                     |
| K5N       | GCG <b>GAATTC</b> GCCACCATGGCGGCGTCAaacGTGAAG                  |
| Q8A       | GCG <b>GAATTC</b> GCCACCATGGCGGCGTCAAAGGTGAAGgcgGACATG         |
| D9A       | GCG <b>GAATTC</b> GCCACCATGGCGGCGTCAAAGGTGAAGCAGgcgATGCC       |
| M10A      | GCG <b>GAATTC</b> GCCACCATGGCGGCGTCAAAGGTGAAGCAGGACgcgCCTCC    |
| P11A      | GCG <b>GAATTC</b> GCCACCATGGCGGCGTCAAAGGTGAAGCAGGACATGgcgCCGCC |
| Δ1-17     | GCG <b>GAATTC</b> GCCACCATGCCCATCGACTACAAGCGGAAC               |
| R115Pf    | TCCACACAACCcccTGGGTGC                                          |
| R115Pr    | ACCCAgggGGTTGTGTGGAAC                                          |
| Rev       | CAG <b>GGATCCC</b> GTGTACCACATGAAGCCG                          |

GRIM-19 R115P mutant amplicon for cloning was obtained by pooling two half-reactions that employed R115P-specific and compatible (WT/Rev) primers in PCR. In the primer sequence, restriction enzyme sites and mutant codons are represented in bold and lower-case alphabets, respectively.
